# Supplementary material
Source: PubMed Central journal article supplement (PMC3522270)
Supplement: supp_M112.387761_jbc.M112.387761-3.pdf [file supp_M112.387761_jbc.M112.387761-3.pdf]

**Supplemental Figure 1.** *DLKI-DIO3* miRNA/mRNA complementarity. Complementarity between the indicated *DLKI-DIO3* cluster miRNAs and the 3' UTR of *SOX2*, *SOX9*, *HIF1A*, *ZEB1*, *ZEB2*, *STAT3* and *CDH1* with mirSVR and PhastCons scoring.

**Supplemental Figure 2.** Effects of *DLKI-DIO3* miRNA gain and loss-of-function on expression of EMT-associated targets in TGF- $\beta$ 1 treated MCF-10A cells. MCF-10A cells were transfected with the indicated miRNA mimic or antagomir, treated with TGF- $\beta$ 1, and 5 days later expressed levels of the indicated mRNA targets were quantified by RT-PCR. Data are expressed as mean + SEM of three separate experiments. \*,  $p < 0.05$ .

**Supplemental Figure 3.** Effects of *DLKI-DIO3* miRNA gain and loss-of-function on expression of EMT-associated targets in MDA-MB-231 cells. MDA-MB-231 cells were transfected with the indicated miRNA antagomirs and at 5 days post-transfection expressed levels of the indicated mRNA targets were quantified by real-time PCR. Data are expressed as mean + SEM of three separate experiments. \*,  $p < 0.05$ .

**Supplemental Figure 4.** Effects of *DLKI-DIO3* miRNA gain and loss-of-function on expression of EMT-associated targets in MCF-10A cells. MCF-10A cells were transfected with the indicated miRNA antagomirs and at 5 days post-transfection expressed levels of the indicated mRNA targets were quantified by RT-PCR. Data are expressed as mean + SEM of three separate experiments. \*,  $p < 0.05$ .

**Supplemental Figure 5.** *DLKI-DIO3* miRNAs affect changes in E-cadherin expression in the MCF-10A cell line. Phase contrast microscopy, DAPI (blue), and E-cadherin (green) staining of the MCF-10A cell line following 20 days of repeated transfection with the indicated miRNA mimics (Upper) or antagomirs (Lower).

**Supplemental Figure 6.** *DLKI-DIO3* miRNAs fail to upregulate E-cadherin in cells that have already undergone EMT. Phase contrast microscopy, DAPI (blue), and E-cadherin (green) staining of the MDA-MB-231 cell line following 20 days of repeated transfection with the indicated miRNA mimics (Upper) or antagomirs (Lower).

**Supplemental Figure 7.** *DLKI-DIO3* miRNAs are sufficient to block TGF- $\beta$ 1 induced EMT and E-cadherin down regulation in the MCF-10A cell line. Phase contrast microscopy, DAPI (blue), and E-cadherin (green) staining of the TGF- $\beta$ 1 treated MCF-10A cell line following 20 days of repeated transfection with the indicated miRNA mimics (Upper) or antagomirs (Lower).

**Supplemental Table 1.** Microarray analysis. MDA-MB-231 cells transfected with miR-544 or control-miR were analyzed by micro-array and mRNAs that exhibited 2, 5, or 10-fold changes in expression were determined by comparative analysis.

**Supplementary Table 2.** Microarray data. MDA-MB-231 cells transfected with miR-544 or control-miR were analyzed by micro-array and raw values from the array data are provided.

**Supplementary Table 3.** 3' UTR primer sequences. Primer sequences used to amplify and clone the 3'UTR of each indicated gene are listed.

**Supplementary Table 4.** Real time RT-PCR primer sequences. The primer sequences used to quantify expressed levels of each miRNA or mRNA target are listed.

**Supplementary Table 5.** CpG island methylation assay primer sequences. The primer sequences used to determine the methylation status of CpG islands upstream of the *DLKI-DIO3* miRNA cluster are listed.

Figure S1.

|                                                              |                                      |                                                       |                                      |
|--------------------------------------------------------------|--------------------------------------|-------------------------------------------------------|--------------------------------------|
| 3' ucUCUCUCAGACGGGAACAUU 5' hsa-miR-300<br>: :               | mirSVR: -0.3618<br>PhastCons: 0.5823 | 3' cuccaaAGGGCACAUAACAAAGu 5' hsa-miR-494<br>    :    | mirSVR: -0.9865<br>PhastCons: 0.7131 |
| 300:5' cqGGGGAAU-GGACCUUGUAUA 3' SOX2                        |                                      | 722:5' qaqaauUCAUCUG-AUGUUUCu 3' HIF1A                |                                      |
| 3' ucucucucagacgggAACAUU 5' hsa-miR-300<br>                  | mirSVR: -0.2788<br>PhastCons: 0.7507 | 3' uuucucacguggcgUUACAA 5' hsa-miR-543<br>            | mirSVR: -0.1967<br>PhastCons: 0.7345 |
| 941:5' cuuuuuuuuccgugUGUUAU 3' SOX2                          |                                      | 928:5' auuugcuaaaauacAAUGUUu 3' HIF1A                 |                                      |
| 3' gcUUAGGUGUGCUUGUUGAAg 5' hsa-miR-382<br>      : : :     : | mirSVR: -0.2155<br>PhastCons: 0.7754 | 3' cuccaaagggcacauACAAGU 5' hsa-miR-494<br>           | mirSVR: -0.1026<br>PhastCons: 0.7026 |
| 452:5' uuAAUUAU-UUGCAAGCAACUU 3' SOX2                        |                                      | 1165:5' uuuuuggcuaaaucUGUUUCc 3' ZEB1                 |                                      |
| 3' gcuuagugugucuuGUUGAAg 5' hsa-miR-382<br>                  | mirSVR: -0.6280<br>PhastCons: 0.8471 | 3' ugugugUUUCUUAUAAAGAGg 5' hsa-miR-539<br>:       :  | mirSVR: -0.6979<br>PhastCons: 0.7703 |
| 1040:5' uaacagguacuuuuCAACUUa 3' SOX2                        |                                      | 872:5' gugugUAAGUCCAAUUUCUc 3' ZEB1                   |                                      |
| 3' uuucucacguggcgUUACAA 5' hsa-miR-543<br>                   | mirSVR: -0.2117<br>PhastCons: 0.7293 | 3' uguguguuuccUAUUAAGAGg 5' hsa-miR-539<br>           | mirSVR: -0.9944<br>PhastCons: 0.6932 |
| 431:5' ccaagcgcaaaaaAAUGUUu 3' SOX2                          |                                      | 1070:5' gauuguuuuAGAAUUUCUCu 3' ZEB1                  |                                      |
| 3' ucucucucAGACGGGAACAUU 5' hsa-miR-300<br>      : :         | mirSVR: -0.1284<br>PhastCons: 0.6255 | 3' uuucucACGGGUACAACAAA 5' hsa-miR-495<br>    :       | mirSVR: -0.3155<br>PhastCons: 0.7710 |
| 1409:5' aacuuuuUUUUUUUGUAU 3' SOX9                           |                                      | 866:5' auuuucUGUACU-UUUUUUUUc 3' ZEB2                 |                                      |
| 3' ucucucucAGACGGGAACAUU 5' hsa-miR-300<br>:     : :         | mirSVR: -0.4809<br>PhastCons: 0.6517 | 3' uuucUCACGGGUACAACAAA 5' hsa-miR-495<br>    : :     | mirSVR: -0.6735<br>PhastCons: 0.8506 |
| 1973:5' uuucuuuuUUUUUUUGUAU 3' SOX9                          |                                      | 1166:5' uuuuAUUUUUUUUUUUUUU 3' ZEB2                   |                                      |
| 3' cuccAAAGGGCACAUAACAAg 5' hsa-miR-494<br>    :             | mirSVR: -0.3831<br>PhastCons: 0.5542 | 3' uuucucacGUGGUACAACAAA 5' hsa-miR-495<br>    :      | mirSVR: -0.4304<br>PhastCons: 0.5973 |
| 961:5' aaucUGUUCUGGGAAUGUUUc 3' SOX9                         |                                      | 1316:5' agguccuCAUCCUGUUUGUU 3' STAT3                 |                                      |
| 3' uuucucacGUGGUACAACAAA 5' hsa-miR-495<br>    :             | mirSVR: -0.7565<br>PhastCons: 0.6139 | 3' uuucucacCGUGGUACAACAAA 5' hsa-miR-495<br>      : : | mirSVR: -0.6347<br>PhastCons: 0.5559 |
| 1886:5' uguguucGUGUUUGUUUGUU 3' SOX9                         |                                      | 1783:5' uuucGUGAAUUCUGUUUGUU 3' STAT3                 |                                      |
| 3' ugUGUGGUUCCUAUUAAGAGg 5' hsa-miR-539<br>: : :             | mirSVR: -0.2711<br>PhastCons: 0.5304 | 3' cuugaacGAUUUUUACGUCUU 5' hsa-miR-544<br>  :     :  | mirSVR: -0.4626<br>PhastCons: 0.7336 |
| 1559:5' auGUGUCAUCCAU-AUUUCUCu 3' SOX9                       |                                      | 5:5' cugagaaCGGAAGCUGCAGAAA 3' STAT3                  |                                      |
| 3' uguguguuuccuuuAAAGAGg 5' hsa-miR-539<br>                  | mirSVR: -0.2059<br>PhastCons: 0.6328 | 3' uuucucacgugguacAAACAAA 5' hsa-miR-495<br>          | mirSVR: -0.3982<br>PhastCons: 0.6466 |
| 1957:5' accuuuccuuuuuuUUUCUCu 3' SOX9                        |                                      | 2015:5' auuuuuuuuuuuuuUUUGUU 3' CDH1                  |                                      |
|                                                              |                                      | 3' gcUUAGGUGUGCUUGUUGAAg 5' hsa-miR-382<br>           | mirSVR: -0.5225<br>PhastCons: 0.5342 |
|                                                              |                                      | 271:5' auAUUCCA-GAAGAACAACUU 3' CDH1                  |                                      |

Figure S2.

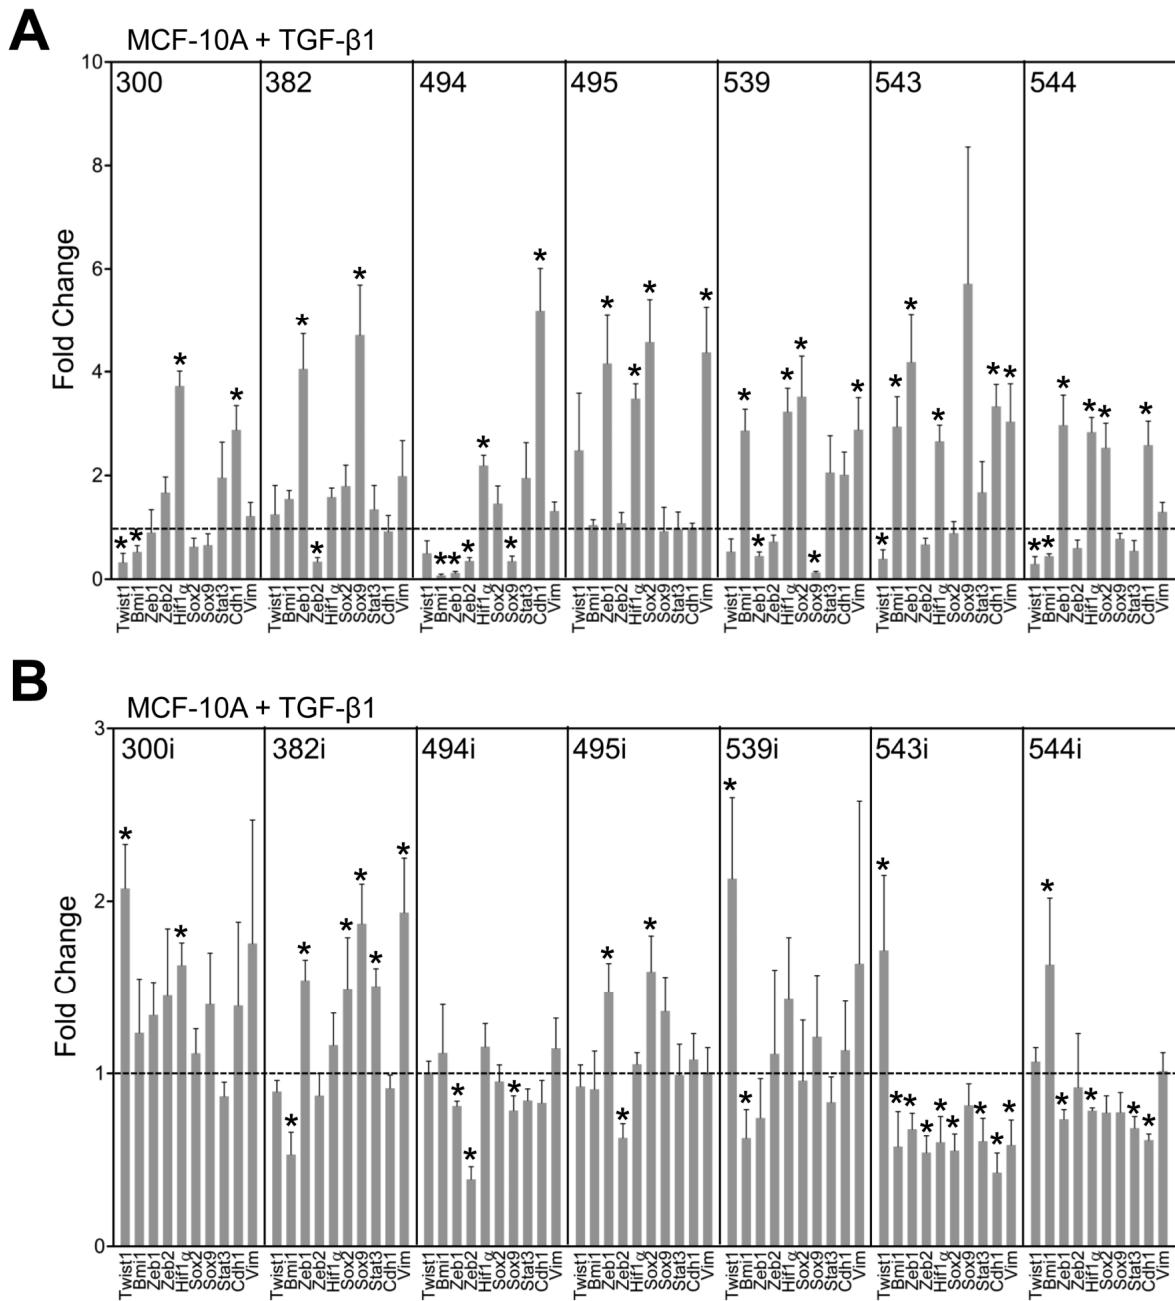



Figure S4.

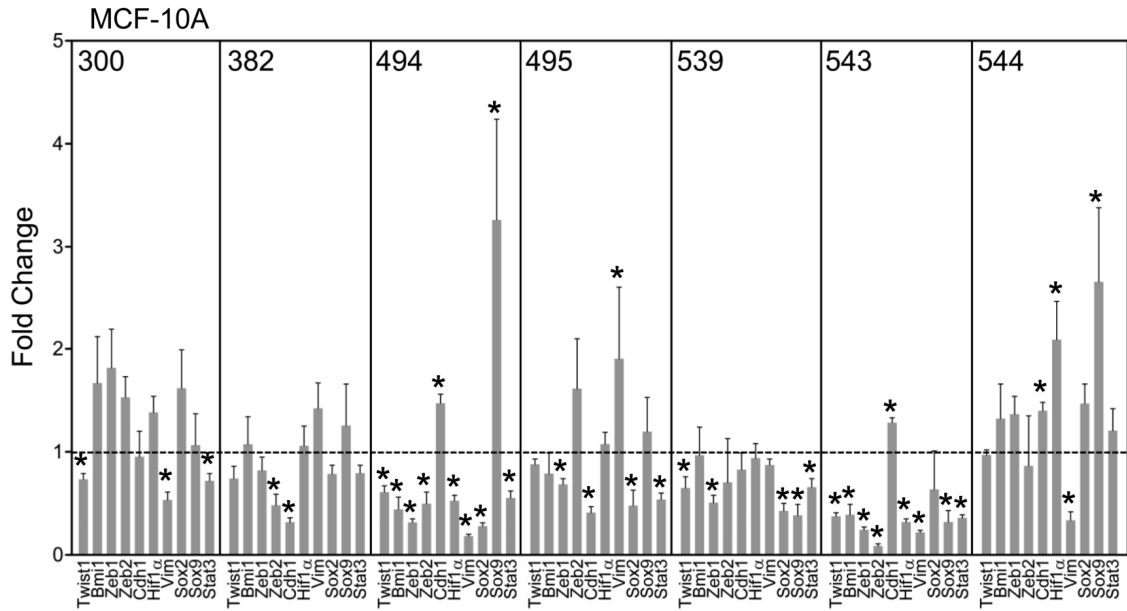

Figure S5.

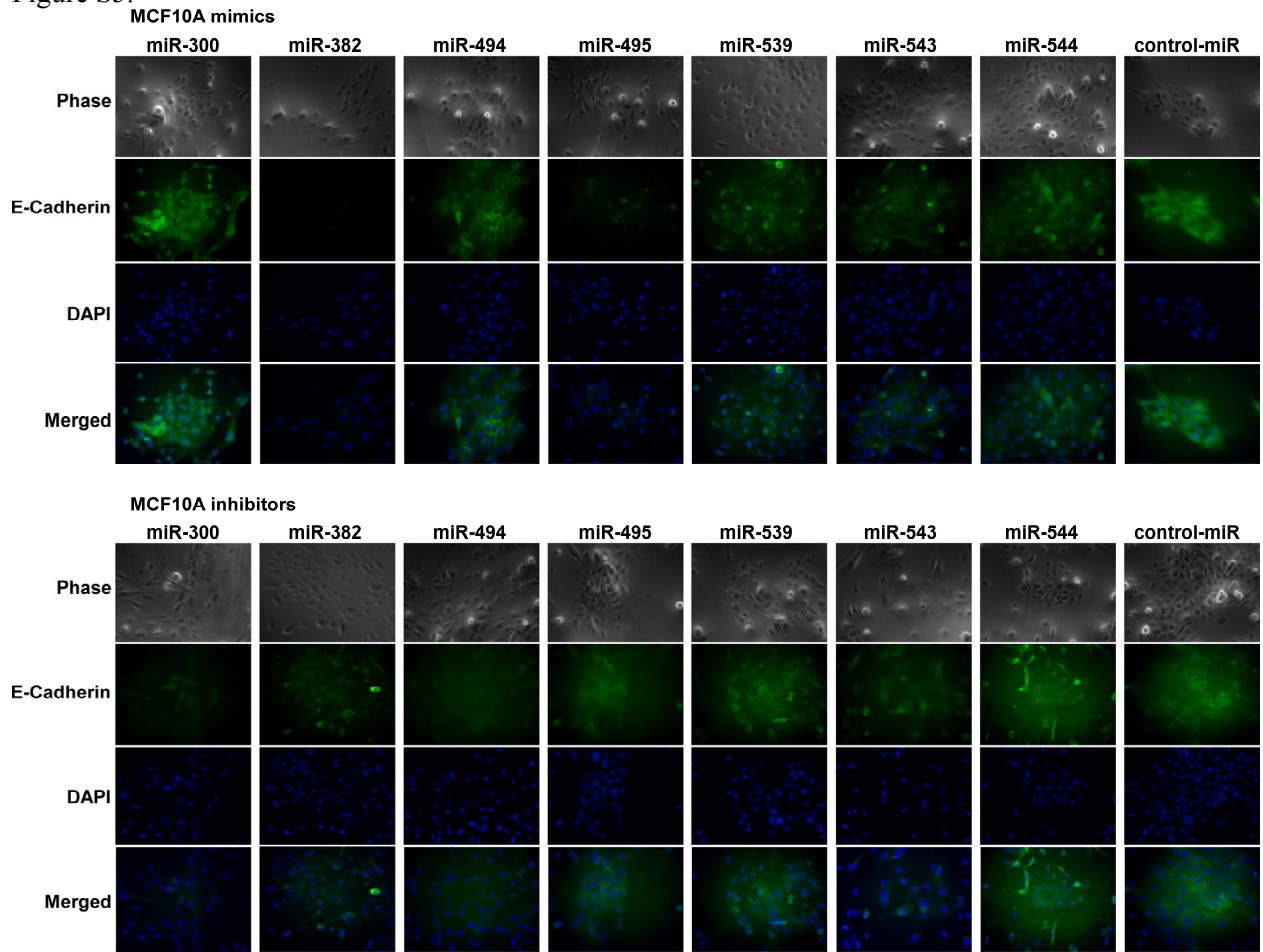

Figure S6.

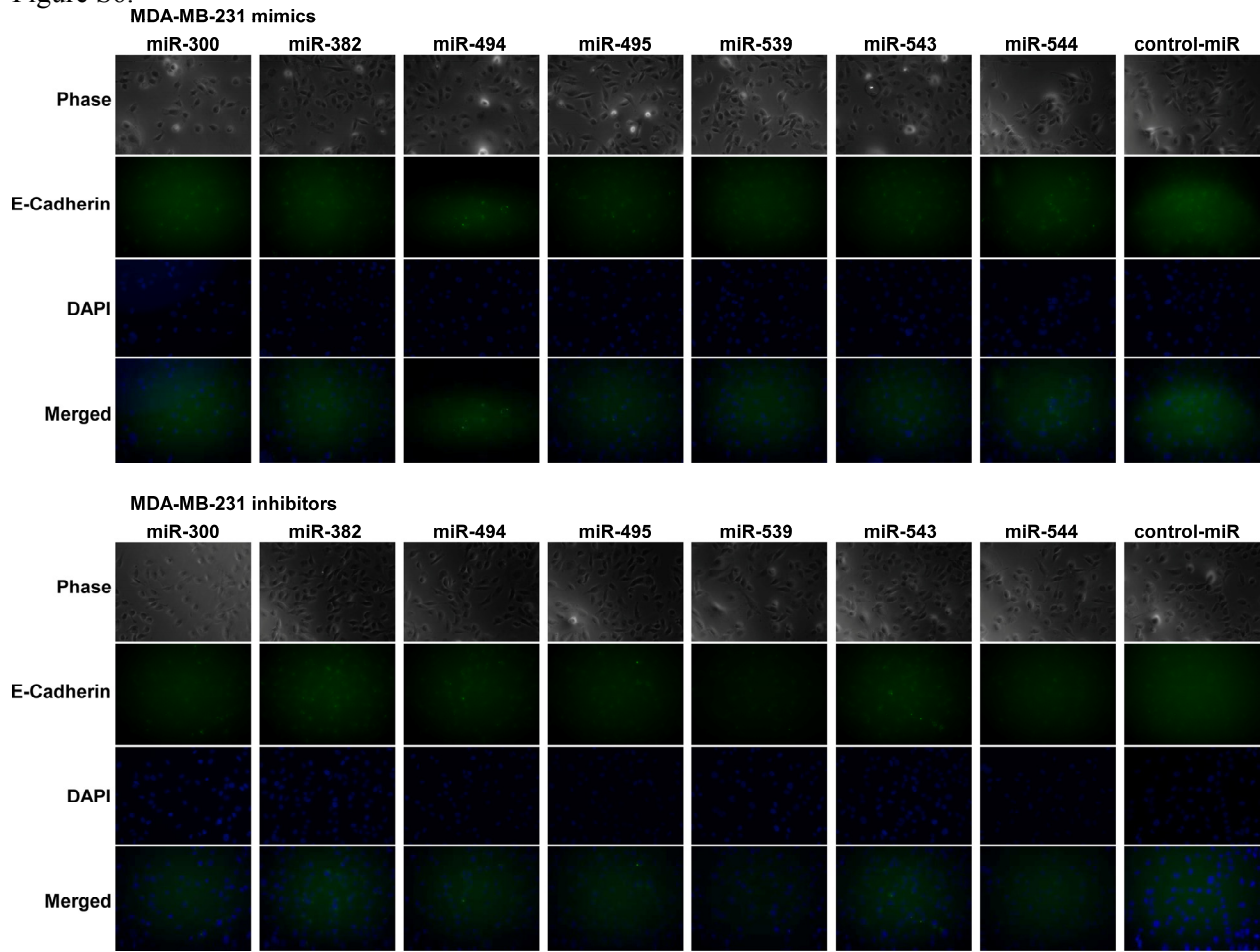

Figure S7.

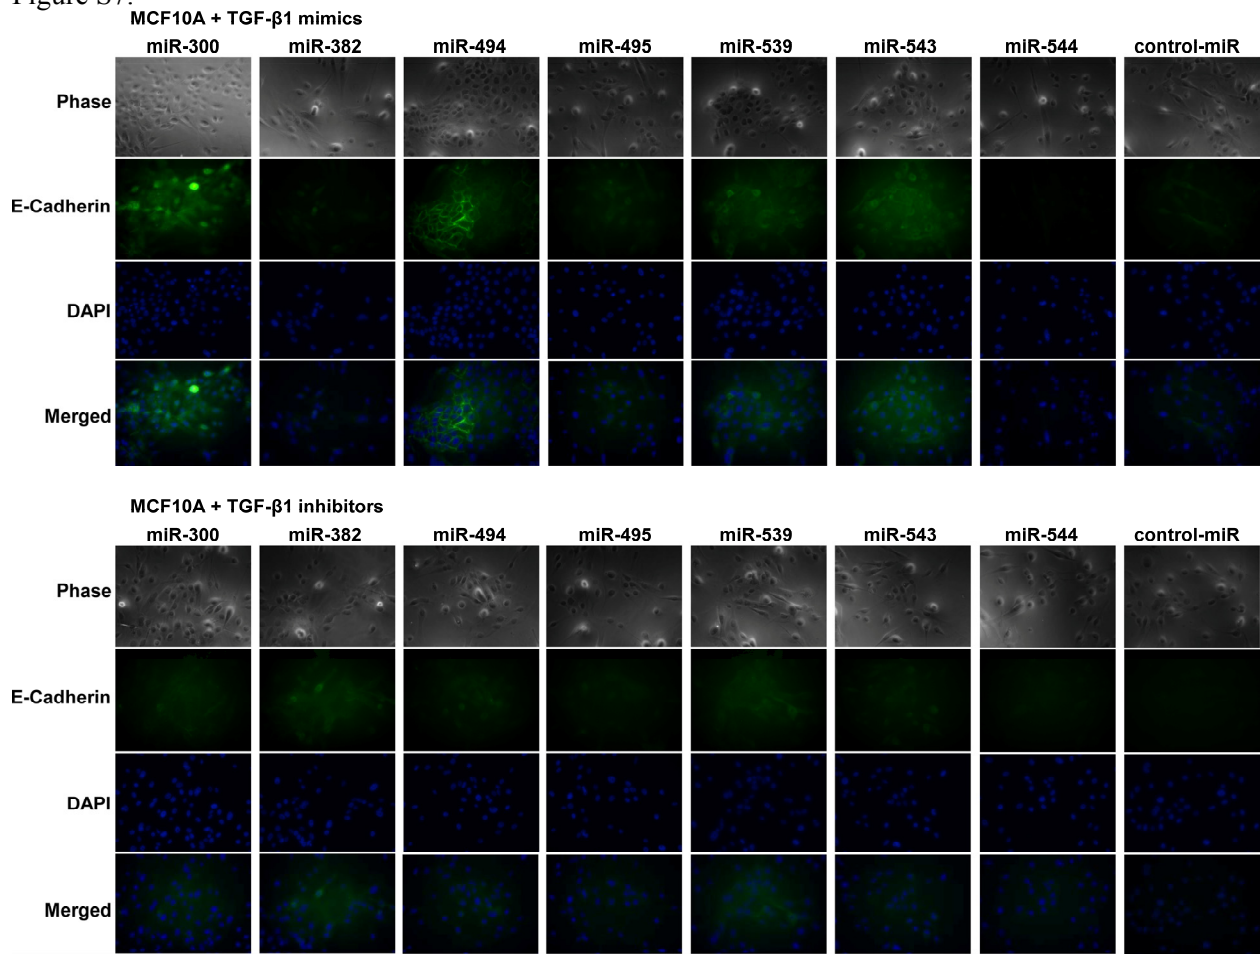



**Supplemental Table 3. 3' UTR primer sequences.**

| <b>Gene</b>   | <b>Forward</b>                             | <b>Reverse</b>                              |
|---------------|--------------------------------------------|---------------------------------------------|
| MYC           | 5' CAA ATG CAA CCT CAC AAC CTT<br>GGC 3'   | 5' TGG CTC AAT GAT ATA TTT GCC<br>AGT 3'    |
| FOXO1         | 5' TGC CCA ATG TGT GCA GGT TAT<br>GTG 3'   | 5' TAA TGG CAC GGG AGG AAA GTG<br>ACA 3'    |
| SOX9          | 5' TGA CCT ATC CAA GCG CAT TAC<br>CCA 3'   | 5' GGG AAA GGT AAG TTT CAC GGA<br>GAG 3'    |
| OSTERIX       | 5' TCA CCA TGA GAC TGG CTT TCC<br>ACA 3'   | 5' ACT TGA GGT TTC ACA GCT TCT<br>GGC 3'    |
| SOX2          | 5' TCA CCA TGA GAC TGG CTT TCC<br>ACA 3'   | 5' ACT TGA GGT TTC ACA GCT TCT<br>GGC 3'    |
| TAZ1          | 5' ATA GAA GGC AGG TGA GCA ACC<br>AGT 3'   | 5' CAG GCC CTA GGA TTC AAG TGA<br>TGT 3'    |
| TWIST2        | 5' CCG AGC CTC TGC ATG ATT GTT<br>TCA 3'   | 5' ATG GCT GCG CGG ACG TCT TTA<br>TTT 3'    |
| SIX1          | 5' CGC CTG TTT CAG CAG CCT TTC<br>TTT 3'   | 5' TTT CTA GAC ACC ATC CGG CAG CA<br>3'     |
| ID2           | 5' GCC CTT TCT GCA GTT GGA AGG<br>TTT 3'   | 5' CTG GTC CTC TGA AAT AAA GCA<br>GGC 3'    |
| TWIST1        | 5' ACC ATC CTC ACA CCT CTG CAT<br>TCT 3'   | 5' CTT GTG CCT GTC AGT AGC TGC<br>TTT 3'    |
| HIF1 $\alpha$ | 5' GTA CGT GGT AGC CAC AAT TGC<br>ACA 3'   | 5' CCA ACA GGG TAG GCA GAA CAT<br>TTA GG 3' |
| CDH1          | 5' CAC TCT TTA CAT GGT GGT GAT<br>GTC C 3' | 5' ACC TAG TCA AGA TGT GGC CAG<br>ACA 3'    |
| BMI1          | 5' TGG ACT ACA TGT GAT ACT CCT<br>ATG 3'   | 5' GCA TGT ACT TCT TAG CCA CAT<br>CAC 3'    |
| ZEB1          | 5' AAT AAA TCC GGG TGT GCC TGA<br>ACC 3'   | 5' TTG TGA GAT GGG AGT CTG GT 3'            |
| ZEB2          | 5' CGA AGT CTT AAA GTG ACC TGG<br>ACG 3'   | 5' ACA TTG TAT TTA ACA GTC CCT<br>CTT T 3'  |
| OCLN          | 5' CTG GGC TGA ACA CTC CAA TTA<br>AGG 3'   | 5' AGG GAG GCT GGT AGA TCA TCA<br>CAT 3'    |
| STAT3         | 5' ACA GCT GAG AAC GGA AGC TGC<br>AGA 3'   | 5' TGA TCA GCT GAG GCA AGG TGG<br>TTT 3'    |

Supplementary Table 4. Real time RT-PCR primer sequences.

| Gene          | Forward                                  | Reverse                                  |
|---------------|------------------------------------------|------------------------------------------|
| SOX9          | 5' GTA CCC GCA CTT GCA CAA C 3'          | 5' GTG GTC CTT CTT GTG CTG C 3'          |
| ATM           | 5' ATC TGC TGC CGT CAA CTA GAA<br>3'     | 5' GAT CTC GAA TCA GGC GCT TAA A<br>3'   |
| SOX2          | 5' AAC CAA GAC GCT CAT GAA GAA<br>G 3'   | 5' CTGCGAGTAGGACATGCTGTAG 3'             |
| TWIST1        | 5' GTC CGC GTC CCA CTA GC 3'             | 5' TCC ATT TTC TCC TTC TCT GGA A 3'      |
| HIF1 $\alpha$ | 5' CGC GAA CGA CAA GAA AAA G 3'          | 5' AAG TGG CAA CTG ATG AGC AA 3'         |
| CDH1          | 5' TTG ACG CCG AGA GCT ACA C 3'          | 5' GAC CGG TGC AAT CTT CAA A 3'          |
| BMI1          | 5' CCA CCT GAT GTG TGT GCT TTG<br>3'     | 5' TTC AGT AGT GGT CTG GTC TTG T<br>3'   |
| ZEB1          | 5' TGT TAC CAG GGA GGA GCA GT<br>3'      | 5' GCT TCA TCT GCC TGA GCT TC 3'         |
| ZEB2          | 5' CGA TCC AGA CCG CAA TTA AC 3'         | 5' TGC TGA CTG CAT GAC CAT C 3'          |
| STAT3         | 5' CCC TTG GAT TGA GAG TCA AGA<br>3'     | 5' AAG CGG CTA TAC TGC TGG TC 3'         |
| VIM           | 5' AGG AAA TGG CTC GTC ACC TTC<br>GTG 3' | 5' GGA GTG TCG GTT GTT AAG AAC<br>TAG 3' |
| miR-200a      | 5' TAA CAC TGT CTG GTA ACG ATG<br>T 3'   | Qiagen Universal Reverse                 |
| miR-200b      | 5' TAA TAC TGC CTG GTA ATG ATG<br>A 3'   | Qiagen Universal Reverse                 |
| miR-200c      | 5' TAA TAC TGC CGG GTA ATG ATG<br>GA 3'  | Qiagen Universal Reverse                 |
| miR-429       | 5' TAA TAC TGT CTG GTA AAA CCG<br>T 3'   | Qiagen Universal Reverse                 |
| miR-141       | 5' TAA CAC TGT CTG GTA AAG ATG<br>G 3'   | Qiagen Universal Reverse                 |
| miR-300       | 5' TAT ACA AGG GCA GAC TCT CT 3'         | Qiagen Universal Reverse                 |
| miR-382       | 5' GAA GTT GTT CGT GGT GGA TT 3'         | Qiagen Universal Reverse                 |
| miR-494       | 5' TGA AAC ATA CAC GGG AAA CC<br>3'      | Qiagen Universal Reverse                 |
| miR-495       | 5' AAA CAA ACA TGG TGC ACT TC 3'         | Qiagen Universal Reverse                 |
| miR-539       | 5' GGA GAA ATT ATC CTT GGT GT 3'         | Qiagen Universal Reverse                 |
| miR-543       | 5' AAA CAT TCG CGG TGC ACT TC 3'         | Qiagen Universal Reverse                 |
| miR-544       | 5' ATT CTG CAT TTT TAG CAA GTT C<br>3'   | Qiagen Universal Reverse                 |
| GAPDH         | 5' TGT GTC CGT CGT GGA TCT GA 3'         | 5' CCT GCT TCA CCA CCT TCT TGA 3'        |
| RNU6b         | Qiagen RNU6b Forward                     | Qiagen Universal Reverse                 |

**Supplementary Table 5. CpG island methylation assay primer sequences.**

| <b>CpG Island</b> | <b>Forward</b>                           | <b>Reverse</b>                          |
|-------------------|------------------------------------------|-----------------------------------------|
| CpG 1             | 5' GTT TAG GGT AGG GAG TTA<br>GAG G 3'   | 5' CCT CCT ACC TAC TAA CCC TCT C<br>3'  |
| CpG 2             | 5' ATT TTA GGG GAA GGG ATT T 3'          | 5' TAA AAT CCA AAC ATA CAC TAT<br>CC 3' |
| CpG 3             | 5' AGA AGG AAA AGA ATT TGT<br>TTA TGG 3' | 5' ATC CCC AAT ATA ATT TCC TCA<br>A 3'  |
| CpG 4             | 5' AGA GTG AAT GGG TTT TTG AAA<br>T 3'   | 5' TCC CTT CCT AAA AAC TCC TTA A<br>3'  |
| CpG 5             | 5' TTG TTA TAG AAT TTG GGG GGT<br>3'     | 5' ACT TCC CCC CAA AAA AAT ATA<br>C 3'  |
| CpG 6             | 5' TTG GTT TTT TTT TGT ATT TTG G<br>3'   | 5' CCA CTC TCC CTA CTA CCT AAA<br>AA 3' |
| CpG 7             | 5' GTT TTT GGA GAG TGT GAG GTT<br>T 3'   | 5' TCC CTT CAA ATA CCA AAA AAA<br>A 3'  |
